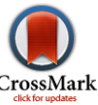

# Predictability in Cellular Automata

Alexandru Agapie<sup>1\*</sup>, Anca Andreica<sup>2</sup>, Camelia Chira<sup>2</sup>, Marius Giuclea<sup>3</sup>

**1** Bucharest University of Economic Studies, Department of Applied Mathematics, Bucharest, Romania, and Institute for Mathematical Statistics and Applied Mathematics, Bucharest, Romania, **2** Babes-Bolyai University, Faculty of Mathematics & Informatics, Cluj-Napoca, Romania, **3** Bucharest University of Economic Studies, Department of Applied Mathematics, Bucharest, Romania

## Abstract

Modelled as finite homogeneous Markov chains, probabilistic cellular automata with local transition probabilities in  $(0, 1)$  always possess a stationary distribution. This result alone is not very helpful when it comes to predicting the final configuration; one needs also a formula connecting the probabilities in the stationary distribution to some intrinsic feature of the lattice configuration. Previous results on the asynchronous cellular automata have showed that such feature really exists. It is the number of zero-one borders within the automaton's binary configuration. An exponential formula in the number of zero-one borders has been proved for the 1-D, 2-D and 3-D *asynchronous* automata with neighborhood three, five and seven, respectively. We perform computer experiments on a *synchronous* cellular automaton to check whether the empirical distribution obeys also that theoretical formula. The numerical results indicate a perfect fit for neighbourhood three and five, which opens the way for a rigorous proof of the formula in this new, synchronous case.

**Citation:** Agapie A, Andreica A, Chira C, Giuclea M (2014) Predictability in Cellular Automata. PLoS ONE 9(10): e108177. doi:10.1371/journal.pone.0108177

**Editor:** Jesus Gomez-Gardenes, Universidad de Zaragoza, Spain

**Received:** April 6, 2014; **Accepted:** July 28, 2014; **Published:** October 1, 2014

**Copyright:** © 2014 Agapie et al. This is an open-access article distributed under the terms of the Creative Commons Attribution License, which permits unrestricted use, distribution, and reproduction in any medium, provided the original author and source are credited.

**Data Availability:** The authors confirm that all data underlying the findings are fully available without restriction. All relevant data are within the paper and its Supporting Information files.

**Funding:** Funding provided by AA PNII-ID-PCCE-2011-0015, Romanian National Authority for Scientific Research, <http://uefiscdi.gov.ro/>, AA Grant PNII-TE-320, Romanian National Authority for Scientific Research, <http://uefiscdi.gov.ro/> and CC Grant PNII-TE-320, Romanian National Authority for Scientific Research, <http://uefiscdi.gov.ro/>. The funders had no role in study design, data collection and analysis, decision to publish, or preparation of the manuscript.

**Competing Interests:** The authors have declared that no competing interests exist.

\* Email: [agapie@clicknet.ro](mailto:agapie@clicknet.ro)

## Introduction

From a mathematical point of view, *cellular automata* (CA) are binary lattices that are updated iteratively. In the automata discussed in this paper, the value of a cell is flipped based only on the number of ones in the neighborhood of the cell to be updated. We call an automaton *synchronous* if all cells are updated simultaneously, respectively *asynchronous* if the updating affects only one cell at a time.

We further call an automaton *deterministic* [5,6,17] if the update follows deterministic rules, respectively *probabilistic* [1-4,7,8,11,12] if at least one of the following holds:

- the updated cell is picked at random
- the local transition rule is probabilistic - e.g., a cell may flip from zero to one with some probability  $p$ , and the same cell may stay in zero with probability  $1 - p$ .

Probabilistic automata are suitable for Markov chain modelling, since the future configuration of the automaton depends only on its present state.

A finite homogeneous Markov chain is a stochastic process that moves according to some probabilities within a finite set of states, say  $S = \{1, 2, \dots, n\}$ , with transition probability from state  $i$  to state  $j$  (denoted  $p_{ij}$ ) depending only on states  $i$  and  $j$ . The square, non-negative *transition matrix*  $P = (p_{ij})_{i,j=1,n}$  gathers all the above transition probabilities. Transition matrix of a Markov chain is always *stochastic* - that is, the sum of probabilities in each row is one, and since in our case the matrix does not change from an iteration to another, it is called *homogeneous*.

A brief introduction to homogeneous Markov chains is given in the following. For more detail, reader is referred to monographs [10,13,14].

**Definition 0.1.** • A state  $i$  is absorbing if  $p_{ii} = 1$ . An absorbing state is never left, once it is entered.

• A stochastic matrix  $P$  is primitive if there is a positive integer  $t$  such that  $P^t$  is (strictly) positive.

• A stochastic matrix is called stable if all its rows are identical.

• Let  $p^{(0)}$  be a probability vector. If  $p^{(0)}$  is the initial distribution of the Markov chain with transition matrix  $P$ , then the distribution after  $t$  steps is  $p^{(t)}$ , with  $p^{(t)} = p^{(0)Y} P^t$ , for all  $t \geq 1$ . If  $\pi' = \pi' P$ , then  $\pi$  is a stationary distribution.

**Theorem 0.2.** Let  $P$  be a primitive transition matrix. Then  $P^t$  converges as  $t \rightarrow \infty$  to a positive stable stochastic matrix  $P^\infty = 1\pi'$ , and the rate of approach to the limit is geometric. Moreover, the limit distribution  $\pi = p^{(0)Y} P^\infty$  has the following properties:

- is unique regardless of the initial distribution  $p^{(0)}$ ;
- has positive entries on all components;
- is also the unique stationary distribution of the associated Markov chain.

There are many problems of interest in Markov chain theory [13]. The *short-term behavior* implies the correct definition of the transition matrix to be associated to some process. The *long term-behavior* is even more important, opening the way for prediction; that is strictly connected to the stationary distribution, and to finding necessary and sufficient conditions that guarantee its existence. Providing the stationary distribution in elegant, analytical form would be a bonus - fortunately, this is the case in our study. Finally, estimating the time the chain takes until

convergence is also of interest - this topic is usually referred to in literature as *absorption time*.

When it comes to CA, literature has focused so far only on the first two topics. The computation of absorption time is also of certain interest, at least for the class of deterministic automata with two attractors, *all zeros* and *all ones*.

### Deterministic Cellular Automata

The monograph of Wolfram [17] and the papers of Chua and co-workers [5,6] are referential works in deterministic CA literature. While Wolfram’s pursuit of explaining complexity uses the empirical analysis of automata as a vehicle, Chua and co-workers put on mathematically sound clothes to Wolfram’s original approach, in form of nonlinear differential equations [15,16]. To make things clear, let us see first a particular CA at work.

Consider a two-state CA (the values of the states are set to 0 and 1 within this paper) with  $N$  cells  $i=1,2,\dots,N$  and *circular connection* - the left-hand neighbor of cell 1 is cell  $N$ . Cell  $i$  is influenced only by itself and its nearest neighbors  $i-1$  and  $i+1$ . The values of cells  $i-1$ ,  $i$  and  $i+1$  are the input of the process that is going to change cell  $i$ . Such system is called 1-D three-neighborhood CA.

In the deterministic case, each of the eight possible input configurations  $\{000,001, \dots, 111\}$  yields a certain output for the central cell  $i$ . There are  $2^8=256$  different functions  $f : \{000,001, \dots, 111\} \rightarrow \{0,1\}$  and each of these functions will be assimilated to a *local rule*. If we denote  $f(000)=\beta_0, f(001)=\beta_1, \dots, f(111)=\beta_7$ , we have a one to one mapping between the 256 functions and the set of Boolean vectors  $(\beta_0, \beta_1, \dots, \beta_7)$ . It is thus natural to identify each of the 256 functions by its associated decimal representation [5]

$$R = \sum_{k=0}^7 \beta_k \cdot 2^k . \tag{1}$$

For example, the famous rule **110** - proved to be a *universal Turing machine* [17] - is defined synthetically by the Boolean vector  $(0,1,1,1,0,1,1,0)$ , and explicitly by table 1. Notice that input consists of the whole three-neighborhood, while output is the new value of the central cell.

It is hard to find an intuitive interpretation of rule **110**. Indeed, neither majority, nor minority governs the CA in table 1:  $000 \rightarrow 0$  would indicate a majority rule, while  $111 \rightarrow 0$  points otherwise.

That is not the case with rule **232**, which clearly defines a majority decision model, table 2.

While Wolfram studied the 256 rules empirically, by running extensive computer experiments [17], Chua and co-workers proved rigorously that more insight into CA dynamic behavior can be gained by associating local rules like the one above to the attractors of so-called *cellular neural networks* (CNN).

As introduced in [5], CNN is a finite string  $i=1,2,\dots,N$  with circular connection, and a nonlinear dynamical system acting on each cell  $i$ , defined by a *state equation*

$$x'_i = [-x_i + (|x_i + 1| - |x_i - 1|)] + [z_2 + c_2(z_1 + c_1(z_0 + b_1u_{i-1} + b_2u_i + b_3u_{i+1}))] \tag{2}$$

**Table 1.** Transition table for CA local rule 110.

|        |     |     |     |     |     |     |     |     |
|--------|-----|-----|-----|-----|-----|-----|-----|-----|
| Input  | 000 | 001 | 010 | 011 | 100 | 101 | 110 | 111 |
| Output | 0   | 1   | 1   | 1   | 0   | 1   | 1   | 0   |

doi:10.1371/journal.pone.0108177.t001

**Table 2.** Transition table for CA local rule 232.

|        |     |     |     |     |     |     |     |     |
|--------|-----|-----|-----|-----|-----|-----|-----|-----|
| Input  | 000 | 001 | 010 | 011 | 100 | 101 | 110 | 111 |
| Output | 0   | 0   | 0   | 1   | 0   | 1   | 1   | 1   |

doi:10.1371/journal.pone.0108177.t002

$$x_i(0) = 0 \quad i = 0, 1, \dots, n.$$

and an *output equation*

$$y_i(Q) = \text{sgn}[z_2 + c_2|(z_1 + c_1|(z_0 + b_1u_{i-1} + b_2u_i + b_3u_{i+1}))|]. \quad (3)$$

Equation (3) provides the steady state output  $Q$  of cell  $i$  for each neighborhood input of type  $(u_{i-1}, u_i, u_{i+1})$ , yet with symbol ‘0’ replaced by ‘-1’, e.g.  $(0, 0, 1)$  becomes  $(-1, -1, 1)$ . For each deterministic local rule, one can set the parameters  $z_2, c_2, z_1, c_1, z_0, b_1, b_2, b_3$  in the above equations such that the trajectory converges to an attractor  $Q$  with output  $y_i(Q)$  generating the -1/1 correspondent of the Boolean vector  $(\beta_0, \beta_1, \dots, \beta_7)$  associated to the rule itself. For example, the state and output equations in case of rule **110** read

$$\begin{cases} x'_i = (-x_i + |x_i + 1| - |x_i - 1|) + [-2 + |(u_{i-1} + 2u_i - 3u_{i+1} - 1)|] \\ x_i(0) = 0 \quad i = 0, 1, \dots, n \\ y_i = \text{sgn}[-2 + |(u_{i-1} + 2u_i - 3u_{i+1} - 1)|] \end{cases} \quad (4)$$

Equations (2)-(3) define only one CA iteration. According to [5], one can use a CNN chip to simulate ‘physically’ a local rule on all cells simultaneously. Therefore, one can describe each local rule as a nonlinear *difference equation*

$$u_i^{t+1} = \text{sgn}[z_2 + c_2|(z_1 + c_1|(z_0 + b_1u_{i-1}^t + b_2u_i^t + b_3u_{i+1}^t))|]. \quad (5)$$

In case of majority rule **232** the difference equation simplifies to

$$u_i^{t+1} = \text{sgn}[u_{i-1}^t + u_i^t + u_{i+1}^t]. \quad (6)$$

In [17], Wolfram starts from a fixed initial initial configuration  $u_i^0$ , runs the 61-cell deterministic CA for each of the 256 local rules, independently, stores the produced configurations in large  $60 \times 61$  bi-colour arrays, then looks for similar patterns among arrays corresponding to different rules. He proves that rule **110** is universal Turing machine and, based on the geometrical similarity, conjectures that three other rules, namely **124**, **137** and **193** are also universal Turing machines.

Using Felix Klein’s *Vierergruppe V*, Chua and co-workers obtain a classification of the 256 rules into 89 global equivalence classes [5]. Rules **110**, **124**, **137** and **193** fall into the same class, which gives a rigorous proof to Wolfram’s conjecture. From a nonlinear dynamics point of view, these four rules are identical. As for the majority rule **232**, it forms a class by its own, there are no other rules equivalent to it. Another interesting application of this analysis is to the problem of *density classification*, see e.g. [9].

### Probabilistic Cellular Automata

In order to describe a probabilistic CA consider the 1-D three neighborhood automaton from the previous section, but with some randomness added to the local transition rule.

Consider first the model of an *asynchronous* CA - only one cell is flipped (at most) per iteration. We pick the cell for the flip uniformly - each cell with equal probability  $1/N$ . Once selected, the value of cell  $i$  changes according to some local probabilities,

**Table 3.** Local transition probabilities, 1-D three-neighborhood CA.

| No. of ones | Probability $\rightarrow 1$ | Probability $\rightarrow 0$ |
|-------------|-----------------------------|-----------------------------|
| 0           | $\epsilon$                  | $1-\epsilon$                |
| 1           | $\alpha$                    | $1-\alpha$                  |
| 2           | $1-\alpha$                  | $\alpha$                    |
| 3           | $1-\epsilon$                | $\epsilon$                  |

doi:10.1371/journal.pone.0108177.t003

depending on the number of ones within the significant neighborhood  $\{i-1, i, i+1\}$ , see table 3, where  $\epsilon, \alpha \in (0, 1)$  are the two parameters of the model.

Table 3 considers all possible transitions, even the virtual ones. For instance, if value of cell  $i$  is 1 and there are two ones in the current neighborhood, cell  $i$  will ‘transit’ to 1 with probability  $1-\alpha$ . In other words, transition  $1 \rightarrow 1$  is still considered a flip. Compared to Wolfram’s model of deterministic CA, the probabilistic model of table 3 allows for a unitary interpretation of local rules. Indeed, it makes no difference between local configurations (110) and (101) as they both have two ones, yet that does not mean that the middle cell will transit to the same value - it still depends on randomness.

The Markov model of the asynchronous three-neighborhood automaton has been introduced in [4]. There are  $2^N$  states in the Markov chain, consisting of all binary configurations of length  $N$ . For an arbitrary state  $i$  - here  $i$  denotes a CA configuration, not a single cell - there are precisely  $N + 1$  positive entries in row  $i$  of the global transition matrix, namely the (global) transitions to states that differ from  $i$  on a single cell, plus the element on the main diagonal.

The off-diagonal probabilities  $p_{ij}$  take values from the set  $\{\epsilon/N, \alpha/N, (1-\alpha)/N, (1-\epsilon)/N\}$  depending on the 0/1 distribution of cells in the significant neighborhood of the cell in  $i$  that should undergo a flip to get  $j$ . The diagonal probability  $p_{ii}$  is equal to one minus all off-diagonal probabilities in row  $i$ . Since  $p_{ii} > 0$  for  $\epsilon, \alpha \in (0, 1)$ , transition matrix is primitive. Then theorem 0.2 guarantees the existence of the *limit distribution*, also the (unique) *stationary distribution* of the Markov chain.

We found formulas for the stationary distribution of various asynchronous cellular automata [1,3,4], and we connected our findings to existent results from Ising and exponential voter model [2]. The most important results are presented in the following.

**Definition 0.3.** A border occurs in a CA configuration between two different successive cells, like in 01 or 10. The total number of borders within configuration  $i$  is denoted  $b(i)$ .

Next theorem induces a class property on the set of configurations, revealing the stationary distribution as function of the number of borders.

**Theorem 0.4.** The stationary distribution of transition matrix  $P$  of asynchronous three-neighborhood CA is  $\pi$ , which

$$\pi_i = \frac{1}{Z} \left( \frac{\epsilon}{1-\alpha} \right)^{\frac{1}{2}b(i)} \tag{7}$$

and  $Z$  a normalization factor.

The computation of  $Z$  is solved by the following.

**Lemma 0.5.** The number of configurations with  $2k$  borders is  $2C_N^{2k}$ , for all  $k = 0, \dots, \lfloor N/2 \rfloor$ .

Before moving further let us explain the practical meaning of the above results. The stationary distribution of the automaton is a probability vector with strictly positive components. That means the CA will not converge to a single state, but it will journey through all states, the sojourn time of each state being proportional to the corresponding probability in the stationary distribution. The succession of states in the journey remains unpredictable. What we can predict is that some configurations will have larger sojourn times than others, and formula (7) maps the sojourn time of a configuration to an exponential function of the number of borders within that configuration. Lemma 0.5 shows how many configurations fall in each class. Within a particular class, all configurations have exactly the same probability in the stationary distribution, thus their sojourn times will be the same.

It is also worth mentioning that the initial CA configuration does not influence the long term behavior of the probabilistic automaton, since the stationary distribution is independent of the Markov chain’s starting point.

The *majority* model fulfils  $\epsilon < 1-\alpha$ , so the basis of the exponential function (7) is sub-unitary, and the larger the number of borders within a configuration, the smaller the time spent by the automaton in that configuration. Consequently, configurations *all zeros* and *all ones*, which both belong to class  $b(i)=0$ , have the largest sojourn times, while configurations 1010... and 0101... (with maximal number of borders) have the smallest sojourn times. Needless to say, situation reverses completely if  $\epsilon > 1-\alpha$ .

In case of the five-neighborhood CA, there is one more parameter involved, call it  $\beta$ , table 4, and the generalization of theorem (0.4) requires a supplementary condition on  $\epsilon$ ,  $\alpha$  and  $\beta$ , which ensures the so-called *detailed balance equation*.

A refinement of the border definition is first needed.

**Definition 0.6.** A  $k$ -border occurs between two different cells situated at distance  $k$  from each other. E.g., in 001 we have a 2-border between first and third cell, and a 1-border between second and third cell.

**Theorem 0.7.** If the following holds

$$\epsilon = \frac{\alpha^2(1-\alpha)}{(1-\beta)^2}, \tag{8}$$

then the stationary distribution of transition matrix  $P$  of asynchronous five-neighborhood CA is  $\pi$ , with

$$\pi_i = \frac{1}{Z} \left( \frac{\alpha}{1-\beta} \right)^{\frac{1}{2}[b_1(i)+b_2(i)]} \tag{9}$$

and  $Z$  a normalization factor.

An analogous of lemma 0.5 also holds.

**Lemma 0.8** The number of configurations with  $b$  order-1 borders and  $t$  order-2 borders is

$$2 \left( C_b^{b-t/2} \cdot C_{N-b-1}^{t/2-1} + C_{b-1}^{b-t/2} \cdot C_{N-b}^{t/2} \right). \tag{10}$$

### Numerical Simulation

Using computer experiments we test the generality of the stationary distributions from previous section. Our assumption is that *synchronous* automata obey the same probability laws as their *asynchronous* counterparts. In order to build a synchronous CA, we drop the ‘only one cell per iteration undergoes a flip’ condition,

**Table 4.** Local transition probabilities, 1-D five-neighborhood CA.

| No. of ones | Probability $\rightarrow 1$ | Probability $\rightarrow 0$ |
|-------------|-----------------------------|-----------------------------|
| 0           | $\epsilon$                  | $1 - \epsilon$              |
| 1           | $\alpha$                    | $1 - \alpha$                |
| 2           | $\beta$                     | $1 - \beta$                 |
| 3           | $1 - \beta$                 | $\beta$                     |
| 4           | $1 - \alpha$                | $\alpha$                    |
| 5           | $1 - \epsilon$              | $\epsilon$                  |

doi:10.1371/journal.pone.0108177.t004

and update all the cells in the same iteration, one by one from left to right.

For each numerical simulation we run  $n$  CA iterations starting from an arbitrary configuration and store the next  $n$  iterations in order to build an *empirical stationary distribution* -  $n$  ranges between  $10^4$  and  $10^6$ .

Consider the three-neighborhood automaton. Formula (7) stands for the theoretical distribution, with constant  $Z$  provided by lemma 0.5. We set local probabilities to  $\epsilon = 0.2$  and  $\alpha = 0.4$ , and the length of CA to  $N = 10$ ; that yields the following partition of the configuration space w.r.t. the number of borders:  $\{0, 2, 4, 6, 8, 10\}$ .

Figure 1 shows a perfect match between the theoretical distribution and the empirical distribution of asynchronous CA, with  $n = 10^5$  and  $n = 10^6$ , respectively. The value of  $n$  has no influence on the numerical results.

We consider next the five-neighborhood CA. The following lemma explains the partition of the configuration space in this case.

**Lemma 0.9.** *The partition induced by formula (10) on the five-neighborhood CA with length  $N = 10$  is given in table 5.*

*Proof.* We need to consider all possible cases w.r.t. the sum of order-1 and order-2 borders, and for each case we should count

the configurations with formula (10). Notice that the number of borders is always even, regardless of the order.

*Class 0*

There are only two configurations in this class, namely *all zeros* and *all ones*.

*Class 2*

One can easily check that this class is empty: there is no configuration with 2 order-1 and 0 order-2 borders, nor vice versa.

*Class 4*

The only non-void combination of borders in this class is  $(2+2)$ , that is, 2 order-1 and 2 order-2 borders. Formula (10) provides in this case

$$2(C_2^1 \cdot C_7^0 + C_1^1 \cdot C_8^1) = 20.$$

*Class 6*

The only cases in this class are  $(4+2)$  and  $(2+4)$ , for which we compute

$$4+2 : \quad 2(C_4^3 \cdot C_5^0 + C_3^3 \cdot C_6^1) = 20$$

$$2+4 : \quad 2(C_2^0 \cdot C_7^1 + C_1^0 \cdot C_8^2) = 70.$$

*Class 8*

The only cases in this class are  $(4+4)$  and  $(6+2)$ , for which we compute

$$4+4 : \quad 2(C_4^2 \cdot C_5^1 + C_3^2 \cdot C_6^2) = 150$$

$$6+2 : \quad 2(C_6^5 \cdot C_3^0 + C_5^5 \cdot C_4^1) = 20.$$

*Class 10*

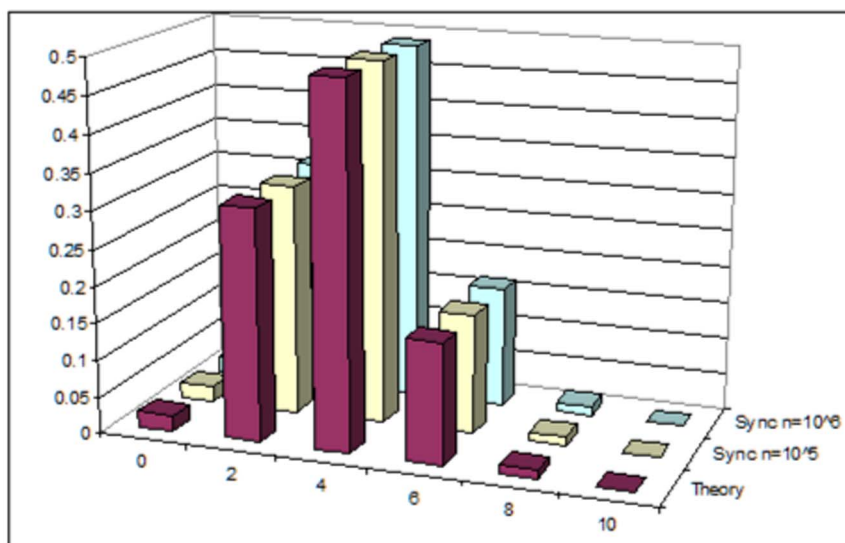

**Figure 1.** Three-neighborhood stationary distribution: Theoretical vs. empirical.

doi:10.1371/journal.pone.0108177.g001

**Table 5.** State partition for five-neighborhood synchronous CA,  $N = 10$ .

| Order-1 plus order-2 borders | 0 | 4  | 6  | 8   | 10  | 12  | 14 |
|------------------------------|---|----|----|-----|-----|-----|----|
| No. of configurations        | 2 | 20 | 90 | 170 | 372 | 320 | 50 |

doi:10.1371/journal.pone.0108177.t005

The only cases in this class are (10+0) - for which there are only two configurations, namely 0101010101 and 1010101010, respectively (8+2), (6+4) and (4+6), for which we compute

$$8+2: \quad 2(C_8^7 \cdot C_1^1 + C_7^7 \cdot C_2^1) = 20$$

$$6+4: \quad 2(C_6^4 \cdot C_3^1 + C_7^7 \cdot C_2^1) = 150$$

$$4+6: \quad 2(C_4^1 \cdot C_5^2 + C_3^1 \cdot C_6^3) = 200.$$

#### Class 12

The only cases in this class are (8+4), (6+6) and (4+8), for which we compute

$$8+4: \quad 2(C_8^6 \cdot C_1^1 + C_7^6 \cdot C_2^2) = 70$$

$$6+6: \quad 2(C_6^3 \cdot C_3^2 + C_5^3 \cdot C_4^3) = 200$$

$$4+8: \quad 2(C_4^0 \cdot C_5^3 + C_3^0 \cdot C_6^4) = 50.$$

#### Class 14

The only case here is (6+8), for which we compute

$$6+8: \quad 2(C_6^2 \cdot C_3^3 + C_5^2 \cdot C_4^4) = 50.$$

Summing up the number of configurations in each class completes the proof.

Basically, we performed the same tests as for the three-neighborhood automaton, with  $n = 10^5$ . There is a difference, though. Theorem 0.7 provides the exponential form of the stationary distribution, but only under condition (8), which ensures detailed balance equation for the associated Markov chain. So it makes sense to test numerically whether this condition is really necessary. We present below results for the five-neighborhood synchronous CA, under two different settings of local transition probabilities: one *arbitrary*,  $(\epsilon, \alpha, \beta) = (0.2, 0.3, 0.4)$ , not fulfilling (8), and the other,  $(\epsilon, \alpha, \beta) = (0.0(8), 0.2, 0.4)$ , in perfect agreement with (8) and denoted *DBE* in figure 2. For *Theory* we used the theoretical stationary distribution (9) of the asynchronous case. The fact that the empirical distribution of the automaton with arbitrary local probabilities is far from the theoretical formula proves that condition (8) can not be removed.

## Discussion

Classification and prediction are the key issues in cellular automata. In the deterministic case, Wolfram relied on the inspiration of a computer analyst to derive patterns from the experimental simulation of different local rules. Chua and co-workers took the analysis a step further by demonstrating rigorously that every local rule can be mapped to a nonlinear dynamical system whose attractors encode accurately that very rule.

The situation is different with Markov chains. Here, predictability takes the form of the stationary distribution, which gathers

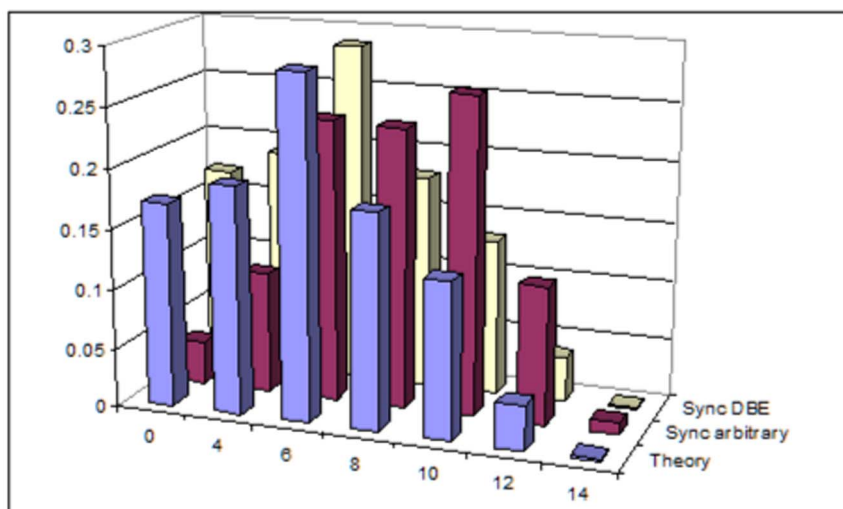

**Figure 2. Five-neighborhood stationary distribution: Theoretical vs. empirical with arbitrary parameters, res. parameters from equation (DBE).**

doi:10.1371/journal.pone.0108177.g002

the long-term sojourn times of each and every state of the system under consideration. For large systems like cellular automata, the existence of the stationary distribution alone is not very helpful, unless we have also an analytic formula able to connect the probabilities in the stationary distribution to some intrinsic features of the automaton configurations. Such fortunate situation is demonstrated in the paper, with an exponential stationary distribution, function of the number of borders within the configuration. The formulas, rigorously proved in previous papers for the asynchronous case, have been successfully tested via computer simulation on synchronous automata.

So far, the validation is only numerical, but the very good agreement between the (theoretical) formula and the (empirical) stationary distribution of synchronous automaton is a clear indication of the generality of the formula. As usually the case in theoretical computer science, the experimental results open the

way for rigorous mathematical proofs, as well as for enlarging the test-bed by considering different variants of cellular automata. Another direction for future research is the stochastic analysis of absorption time, in case of the automata converging to the extreme configurations *all zeros* and *all ones*.

## Supporting Information

**File S1 Numerical results for different automata.**  
(XLS)

## Author Contributions

Conceived and designed the experiments: A. Agapie A. Andreica. Performed the experiments: CC. Analyzed the data: MG. Contributed reagents/materials/analysis tools: A. Andreica. Wrote the paper: A. Agapie A. Andreica CC MG.

## References

- Agapie A (2010) Simple form of the stationary distribution for 3D cellular automata in a special case. *Physica A* 389: 2495–2499.
- Agapie A, Höns R, Agapie Ad (2010) Limit behavior of the exponential voter model. *Mathematical Social Sciences* 59: 271–281.
- Agapie A, Aus der Fuenten T (2008) Stationary distribution for a majority voter model. *Stochastic Models* 24: 503–512.
- Agapie A, Mühlbein H, Höns R (2004) Markov Chain Analysis for One-Dimensional Asynchronous Cellular Automata. *Methodology and Computing in Applied Probability* 6: 181–201.
- Chua LO, Yoon S, Dogaru R (2002) A nonlinear dynamics perspective of Wolframs new kind of science. Part III: Predicting the Unpredictable. *Int J Bifurcation and Chaos* 14: 3689–3820.
- Chua LO, Yoon S, Dogaru R (2002) A nonlinear dynamics perspective of Wolframs new kind of science. Part I: Threshold of complexity. *Int J Bifurcation and Chaos* 12: 2655–2766.
- Clifford P, Sudbury A (1973) A model for spatial conflict. *Biometrika* 60: 581–588.
- Durrett R (1988) *Lecture Notes on Particle Systems and Percolation*. Wadsworth.
- Gog A, Chira C (2009) Cellular Automata Rule Detection Using Circular Asynchronous Evolutionary Search. *Lecture Notes in Computer Science* 5572: 261–268.
- Iosifescu M (2007) *Finite Markov Processes and Applications*. Dover New York.
- Holley R, Liggett TM (1975) Ergodic theorems for weakly interacting systems and the voter model. *Ann Probab* 3: 643–663.
- Liggett TM (2005) *Interacting Particle Systems*. Springer New York.
- Parzen E (1999) *Stochastic Processes*. SIAM Philadelphia.
- Seneta E (1981) *Non-negative Matrices and Markov Chains*. New York Springer.
- Shilnikov L, Shilnikov A, Turaev D, Chua L (2001) *Methods of Qualitative Theory in Nonlinear Dynamics - Part II*. World Scientific Singapore.
- Shilnikov L, Shilnikov A, Turaev D, Chua L (1998) *Methods of Qualitative Theory in Nonlinear Dynamics - Part I*. World Scientific Singapore.
- Wolfram S (2002) *A New Kind of Sciences*. Wolfram Media Inc Champaign Illinois.
